# Supplementary material for: Microbial community networks across body sites are associated with susceptibility to respiratory infections in infants
Source: PubMed Central journal article supplement (PMC8553847; doi:10.1038/s42003-021-02755-1), 2021-10-28
Supplement: 42003_2021_2755_MOESM2_ESM.pdf [file 42003_2021_2755_MOESM2_ESM.pdf]

## **Description of Additional Supplementary Files**

**File name:** Supplementary Data 1

**Description:** Tables in Excel format containing the Source Data for the plots in the main manuscript and the Supplementary Information.
